# Supplementary material
Source: HighWire-hosted journal article supplement (https://www.qdcxjkg.com/highwire/filestream/113561/field_highwire_adjunct_files/4/18_Romeis1948.pdf)
Supplement: 18_Romeis1948.pdf [file 18_Romeis1948.pdf]

Reference no. 18 of

Winkelmann A, Noack T: The Clara cell – a 'Third Reich eponym'? *Eur Respir J* 2010; 36: 722–727

Romeis B, Heiß R, von Lanz T: Stellungnahme der 3 ordentlichen Fachvertreter für Anatomie zum Antrag von Herrn Professor Clara auf Wiederaufnahme in die medizinische Fakultät München vom 30.7.1948 [Representation of the 3 ordinary representatives of anatomy regarding the application of Professor Clara for re-entry into the Medical Faculty of Munich]. 1948. *Archive*: Universitätsarchiv, München. *Signature*: E-II-1066.

### **Short comment by the authors:**

This 5-page statement of the three professors of anatomy of Munich University opposes re-employing Max Clara in his former post at the Institute of Anatomy in 1948. First, the authors argue against it on practical grounds, stating that no vacant professorship was available at the Institute (p. 1). Second, they point out that Clara was appointed to the Chairs in Leipzig and Munich against the explicit wishes of the faculties and that this would not have been possible without Nazi support (pp. 1-3). Thirdly, they report that despite Clara's official acquittal by the denazification process, all members of the Institute of Anatomy remember his agitation for National Socialism, including that he threatened colleagues with the *Gestapo* (p. 4). Finally, they warn against a "renazification" of Munich University and mention their former colleague Fritz Wassermann, expelled by the Nazis in 1937, who was about to return to Munich as part of an American delegation and who could not be expected to accept that convinced Nazis had retained their academic posts (p. 5).

Betrifft: Stellungnahme der 3 ordentlichen Fachvertreter für Anatomie zum Antrag von Herrn Professor Clara auf Wiederaufnahme in die medizinische Fakultät München.

*Im Namen d. Fakult.*  
*zumittele W. H.*

*Stellen für Anst. Prof. Clara*  
*Wannitz*

Herr Professor Dr. Max Clara, von Oktober 1942 bis Frühjahr 1945 Direktor der Anatomischen Anstalt München, hat, nachdem er von der Berufungskammer München überraschender Weise als "entlastet" erklärt wurde, den Antrag auf Wiederaufnahme in die medizinische Fakultät München ohne "diffamierende Einschränkung" gestellt.

Wenn überhaupt, so kann die Fakultät folglich Herrn Clara nur als ordentlichen Professor wieder aufnehmen. Sein Ordinariat aber ist auf dem ordentlichen Berufungsweg seit 13 Monaten besetzt. Die Anatomische Anstalt München hat im Jahre 1947 eine Neuordnung erfahren; sie umfasst jetzt drei Institute, an denen 3 ordentliche Professoren als Institutsdirektoren arbeiten und allen Lehraufgaben vollwertig gerecht werden. Es ist nach der Neuordnung auch räumlich und einrichtungsmäßig untragbar, einen 4. Ordinarius für Anatomie hier unterzubringen.

Die Aufnahme in die Fakultät "ohne diffamierende Einschränkung", die volle Lehrfreiheit gewährt, hatte ohne Zweifel zur Folge, daß die Lehraufgaben der drei Ordinarien, die an und für sich schon durch die Aufteilung des anatomischen Lehrstoffes in drei Teile stark abgegrenzt sind, noch erhebliche weitere Einschränkungen erlitten. Wenn auch Professor Clara jetzt angibt, die bestehende Ordnung der Anatomischen Anstalt nicht stören zu wollen, so würde das mit Sicherheit doch ganz zwangsläufig geschehen, weil er mit den Vorlesungen aus seinen Spezialgebieten: Histologie, Entwicklungsgeschichte, Anatomie des Nervensystems in die Auf-

./.

UA - 92-36 1034 - (Kopie aus FA Max Clara UAM) E-II-1000

gabengebiete der anderen Herren übergreift und die Studenten - wie er sich selbst ausdrückt - die bessere, d.h. für den Studenten schmackhaftere Vorlesung besuchen werden. Daß diese aber bei der Mentalität der Studenten noch lange nicht die bessere zu sein braucht und das Ganze zu Unzuträglichkeiten führen muß, liegt auf der Hand.

Es bestehen aber auch andere schwerwiegende Bedenken gegen die Wiederaufnahme von Herrn Clara in die Münchener Medizinische Fakultät. Es ist in ganz Deutschland und weit über seine Grenzen hinaus bekannt, daß Herr Clara, obwohl heute entlastet, eine mit der nationalsozialistischen Reichsleitung eng liierte und von ihr besonders begünstigte Persönlichkeit war. Von Geburt Südtiroler, lebte er nach seinem medizinischen Staatsexamen als praktischer Arzt in Blumau bei Bozen. 1928 habilitierte er sich in Rom für Histologie und Embryologie; in den folgenden Jahren las er als Privatdozent in Padua über Histologie. Es ist kaum denkbar, daß Herr Clara 1935 von Blumau als Ordinarius und Direktor des Anatomischen Instituts nach Leipzig, einer der größten Universitäten Deutschlands gekommen wäre, wenn er sich nicht der größten Förderung seitens oberster Partiestellen erfreut hätte. Es ist bekannt, daß gerade Leipzig auf Ordinariate früher nur Herren berief, die sich bereits an kleineren Universitäten als Ordinarien bewährt hatten.

Entgegen den Entlastungsgutachten der Herren Prof. Hueck und Thomas stellten wir auf Grund unserer Unterlagen fest, daß Herr Clara ursprünglich nicht auf der Vorschlagsliste der Leipziger Fakultät stand, die zuletzt auf Benninghoff, Petersen, Stieve lautete. Aus politischen Gründen wurde aber keiner dieser drei Herren berufen. Es wurde vielmehr der Fakultät mitgeteilt, daß ein Nationalsozialist berufen werden müsse und zwar entweder Wetzel in Würzburg oder Clara aus Blumau bei Bozen. Schon Juni 1934 wurde unter parteiamtlicher Unterstützung der Versuch gemacht, Herrn Clara auf die Liste zu bringen. Vermutlich bezieht sich die Angabe von Herrn Hueck, daß Clara im Einverständnis mit der Fakultät berufen worden sei, darauf, daß die Fakultät auf die oben erwähnte Alternative hin mittelte, daß sie sich

Heber für Clara als für Wetzel entscheide.

Jedenfalls geht auch aus dem beim Dekanat liegenden Bericht des Dozentenführers Studentkowski vom 8. März 1935 hervor, daß dieser die fachlichen Bedenken der Leipziger Fakultät gegen Herrn Clara auch dem Reichserziehungsministerium gegenüber ausdrücklich zur Sprache brachte, trotzdem aber dann von dieser Seite die Zustimmung zur Einleitung von Berufungsbehandlungen mit Herrn Clara erhielt. Herr Studentkowski sprach Prof. Jansen, dem Referenten für medizinische Hochschulangelegenheiten gegenüber sogar von einer Fehlberufung.

Auch in einem Brief des mit Clara befreundeten Leipziger Professors für Zahnheilkunde Dr. Reichenbach vom 21.2.1941 ist betont, daß Herr Clara, der in Südtirol wegen seiner nationalsozialistischen Betätigung große Schwierigkeiten gehabt habe, auf Veranlassung des damaligen Reichsärztesführers den Ruf nach Leipzig erhielt.

Ganz ähnlich sind die Vorgänge, die sich bei der Berufung Herrn Claras auf das Münchener Ordinariat abspielten. Auch hier wurde der Namen Claras von der Fakultät erst nachträglich an die Vorschlagsliste angefügt, nachdem die Dreierliste Dabelow - Benninghoff - Goerttler zurückgewiesen und die Fakultät von parteiamtlicher Seite vor die Alternative: Wetzel oder Clara gestellt worden war.

Aus einem Brief des Parteigenossen Prof. Reichenbach (Leipzig) an den Parteigenossen Prof. Pieper (München) geht hervor, daß Herr Clara schon im Februar 1941, also noch zu Lebzeiten von Prof. Vogt, auf das Gerücht von dessen vorzeitiger Emeritierung hin, Kräfte der Partei mobilisierte, um auf das Ordinariat in München zu kommen.

Durch all das wird erwiesen, daß Herr Clara größter Nutznießer der Partei war. Es ist bekannt, daß er und Wetzel jahrelang alle Berufungen auf anatomische Lehrstühle im Auftrag der Reichsleitung zu begutachten hatten. Das Vertrauen der Partei geht auch daraus hervor, daß er im Jahre 1938 anlässlich der internationalen Anatomientagung in Mailand von der Reichsleitung zum politischen Führer der deutschen Abordnung ernannt worden war.

Nachdem im Jahre 1942 Herrn Clara gegen den Willen der Fakultät das Münchner Ordinariat für das Gesamtfach der Anatomie und die Direktion der Anatomischen Anstalt übertragen war, wurden unter seiner Direktion naturgemäß stark parteigebundene wissenschaftliche und technische Arbeitskräfte eingestellt und gefördert, darunter Elemente (Leichter), deren korrupte Praktiken der Anatomie und ihrem Ruf schweren Schaden zugefügt haben und deren Wiedereinstellung unbedingt verhindert werden muß. Es würde unter den entlassenen Dozenten, Beamten, Angestellten und Arbeitern der Anatomie berechnete Erbitterung hervorrufen, wenn der frühere Direktor der Anstalt, der ihnen allen als Günstling der Partei wohlbekannt war, wieder aufgenommen würde, während man ihnen, die heute Mitläufer und Annerstierte sind, die Wiedereinstellung aus berechtigten Gründen verweigert.

Professor Clara hat sich offen zu den Ideen und Prinzipien des Nationalsozialismus bekannt. Das weiß auch das noch vorhandene Personal, dem es nicht verständlich wäre, wenn er im gleichen Institut, wie wenn nichts geschehen wäre, wieder einzuziehen würde. Auch hat es nicht vergessen, daß Herr Clara im Frühjahr 1944 in einer von ihm einberufenen Institutsversammlung wegen Kleinigkeiten (zu häufiger Vertretung beim Luftschutzdienst) mit der Gestapo gedroht hat. Es wird auch betont, daß er 1945 im Bewußtsein seiner starken Belastung aus Gründen persönlicher Sicherheit vor dem Einmarsch der Amerikaner geflohen ist und das ihm anvertraute Institut ohne Bedenken seinem Schicksal überließ.

Alle diese Tatsachen sind weit über den Kreis der Institutsangehörigen bekannt, daran kann auch die jetzige Einweisung in Gruppe V nichts ändern. Die Wiederaufnahme von Prof. Clara in die Fakultät würde daher eindeutig ausdrücken, daß die Fakultät dem Wiedererstehen des Nationalsozialismus willig Tür und Tor öffnet.

Ist Prof. Clara wieder Fakultätsmitglied, so werden alle seine Trabanten ihm nachziehen, darunter 4 habilitierte Dozenten, die das Weiterkommen der derzeitigen, unbelasteten Assistenten hindern würden. Prof. Clara steht im 50. Lebensjahre, ist also jünger als die 3 derzeitigen Ordinarien. Sitz und Stimme von Prof. Clara in der Fakultät wür-

den in späteren Berufungsverhandlungen ausschlaggebend für das weitere Schicksal der Anatomie sein, d.h. die Fakultät würde durch die Aufnahme des überzähligen Ordinarius für Anatomie in ihre Reihen sich selbst der Möglichkeit berauben, die anatomischen Ordinariate nach objektiven Gesichtspunkten neu zu besetzen.

Die medizinische Fakultät München wird in den nächsten Wochen die Kollegen der amerikanischen Regierungskommission empfangen. Unter ihnen ist Professor Fritz Wassermann, der von 1907 bis 1937 an der Münchner Anatomie als hervorragender Lehrer und Forscher tätig war. Professor Wassermann wurde in München entlassen! Seine alte Mutter und seine Schwester haben 3 Jahre Theresienstadt erlitten, sein Bruder Paul ist ums Leben gekommen. Kann Herr Wassermann zugemutet werden, mit unserer Fakultät wieder freundschaftliche Verbindung aufzunehmen, wenn kurz vor seinem Besuch Herren Mitglieder der Fakultät werden, die 12 Jahre und noch länger überzeugte Anhänger der nationalsozialistischen Ideologien und Praktiken gewesen sind? Keiner der uns wohlgestimmten Emigrierten und Ausländer, die unsere deutschen Universitäten bereisen und uns Hilfe bringen wollen, könnte weder an unsere Einsicht glauben, daß der Nationalsozialismus die Schuld am allgemeinen Elend trägt noch an unseren guten Willen, die Ausgestoßenen das bittere Unrecht vergessen zu machen, das ihnen von nationalsozialistischer Seite widerfahren ist. Es wäre eine Herausforderung aller Geschädigten, wollte die Fakultät die überzeugten Nationalsozialisten wieder in ihre im 3. Reich gewonnenen Stellungen zurücknehmen, wie wenn nichts geschehen wäre und ein untrüglicher Beweis, daß die medizinische Fakultät München sich offenen Auges der Renazifizierung ausliefert.

gez. R o m e i s    gez. H e i ß    gez. L a n z

Den...    Akt. Hoff...    Akt. Th...  
Chirurgie    Akt. II, I    I  
Kp
